# Supplementary material
Source: publisher site journal article supplement (https://www.dovepress.com/article/605699)
Supplement: Supplementary file 1 [file 605699%20Supplementary%20Material.pdf]

|                                                                                                                                                                           |                                                                                                                                                                 |
|---------------------------------------------------------------------------------------------------------------------------------------------------------------------------|-----------------------------------------------------------------------------------------------------------------------------------------------------------------|
| <b>Clinical Trial Information / Patient Information</b><br>Partner Name<br>Partner Study ID<br>FMI Study ID<br>Site<br>Patient Sex <b>Female</b><br>Patient Date of Birth | <b>Sample Information</b><br>Accession Number<br>Diagnosis <b>Lung Cancer</b><br>Received Date<br>Visit Type<br>Date Collected<br>Sample Type <b>Slide Deck</b> |
|---------------------------------------------------------------------------------------------------------------------------------------------------------------------------|-----------------------------------------------------------------------------------------------------------------------------------------------------------------|

For Microsatellite Instability (MSI) Results, confirmatory testing using a validated orthogonal method should be performed.

Enrollment Eligible Alterations

| GENE                          | ALTERATION |
|-------------------------------|------------|
| No Eligible Variants Detected |            |

**Genomic Alterations Identified**

| <b>GENE</b> | <b>ALTERATION</b> |
|-------------|-------------------|
| ARID1A      | M1634fs*14        |
| BRAF        | BRAF-AGK fusion   |
| CCNE1       | amplification     |
| EGFR        | L858R             |

**Variants of Unknown Significance Identified**

| <b>GENE</b> | <b>ALTERATION</b> |
|-------------|-------------------|
| ATM         | M1131I            |
| ATRX        | D980G             |
| ATRX        | L647I             |
| BRCA2       | G2901D            |
| CALR        | K368del           |
| HSD3B1      | T328S             |
| IGF1R       | E229K             |
| INPP4B      | D762V             |
| JAK2        | I899T             |
| MLL         | F2437Y            |
| MLL         | G2892A            |
| RAC1        | amplification     |

**Advanced Genomic Analysis**

| <b>Biomarker</b> | <b>Status/Score</b> |
|------------------|---------------------|
| TMB              | 8.83                |
| MSI              | MSI-Stable          |

## APPENDIX - PERFORMANCE SPECIFICATIONS

**FOUNDATION PERFORMANCE SPECIFICATIONS**

| ACCURACY                                                                                                                                                                                                                                                                                                                                                                                                                                             |                                       |                                                                                                                                              |
|------------------------------------------------------------------------------------------------------------------------------------------------------------------------------------------------------------------------------------------------------------------------------------------------------------------------------------------------------------------------------------------------------------------------------------------------------|---------------------------------------|----------------------------------------------------------------------------------------------------------------------------------------------|
| <b>Sensitivity : Base Substitutions</b>                                                                                                                                                                                                                                                                                                                                                                                                              | At Mutant Allele Frequency $\geq$ 10% | >99.9% (CI* 99.6%-100%)                                                                                                                      |
|                                                                                                                                                                                                                                                                                                                                                                                                                                                      | At Mutant Allele Frequency 5-10%      | 99.3% (CI* 98.3%-99.8%)                                                                                                                      |
| <b>Sensitivity: Insertions/Deletions (1-40 bp)</b>                                                                                                                                                                                                                                                                                                                                                                                                   | At Mutant Allele Frequency $\geq$ 20% | 97.9% (CI* 92.5%-99.7%)                                                                                                                      |
|                                                                                                                                                                                                                                                                                                                                                                                                                                                      | At Mutant Allele Frequency 10-20%     | 97.3% (CI* 90.5%-99.7%)                                                                                                                      |
| <b>Sensitivity: Copy Number Alterations-Amplifications</b><br>(ploidy <4, Amplification with Copy Number $\geq$ 8)                                                                                                                                                                                                                                                                                                                                   | At $\geq$ 30% tumor nuclei            | >99.0% (CI* 93.6%-100%)                                                                                                                      |
|                                                                                                                                                                                                                                                                                                                                                                                                                                                      | At 20% tumor nuclei                   | 92.6% (CI* 66.1%-99.8%)                                                                                                                      |
| <b>Sensitivity: Copy Number Alterations-Deletions</b><br>(ploidy <4, Homozygous Deletions)                                                                                                                                                                                                                                                                                                                                                           | At $\geq$ 30% tumor nuclei            | 97.2% (CI* 85.5%-99.9%)                                                                                                                      |
|                                                                                                                                                                                                                                                                                                                                                                                                                                                      | At 20% tumor nuclei                   | 88.9% (CI* 51.8%-99.7%)                                                                                                                      |
| <b>Sensitivity: Rearrangements</b> (selected rearrangements in specimens with $\geq$ 20% tumor nuclei)**                                                                                                                                                                                                                                                                                                                                             |                                       | >90.0% <sup>1</sup><br>>99.0% for ALK fusion <sup>2</sup><br>(CI* 89.1%-100%)                                                                |
| <b>Sensitivity: Microsatellite status</b>                                                                                                                                                                                                                                                                                                                                                                                                            | At $\geq$ 20% tumor nuclei            | 97.0% (CI* 89.6%-99.6%)                                                                                                                      |
| <b>Specificity: all variant types</b>                                                                                                                                                                                                                                                                                                                                                                                                                | Positive Predictive Value (PPV)       | >99.0%                                                                                                                                       |
| <b>Specificity: Microsatellite status</b>                                                                                                                                                                                                                                                                                                                                                                                                            | Positive Predictive Value (PPV)       | >95.0%                                                                                                                                       |
| <b>Accuracy: Tumor Mutation Burden</b>                                                                                                                                                                                                                                                                                                                                                                                                               | At $\geq$ 20% tumor nuclei            | >90%                                                                                                                                         |
| <b>REPRODUCIBILITY</b> (average concordance between replicates)                                                                                                                                                                                                                                                                                                                                                                                      |                                       | 96.4% inter-batch precision<br>98.9% intra-batch precision<br>95.8% microsatellite status precision<br>96.4% tumor mutation burden precision |
| <b>Loss of heterozygosity:</b> Performance of LOH in this assay has been shown to be equivalent to performance of FoundationFocus BRCA LOH. Performance details can be found at: <a href="https://www.accessdata.fda.gov/scripts/cdrh/cfdocs/cfpma/pma.cfm?id=P160018S001">https://www.accessdata.fda.gov/scripts/cdrh/cfdocs/cfpma/pma.cfm?id=P160018S001</a> . Samples with <35% tumor may have decreased sensitivity for LOH score determination. |                                       |                                                                                                                                              |

\* 95% Confidence Interval

\*\* Performance for gene fusions within targeted introns only. Sensitivity for gene fusions occurring outside targeted introns or in highly repetitive intronic sequence contexts is reduced.

<sup>1</sup>Based on analysis of coverage and rearrangement structure in the COSMIC database for the solid tumor fusion genes where alteration prevalence could be established, complemented by detection of exemplar rearrangements in cell line titration experiments.

<sup>2</sup>Based on ALK rearrangement concordance analysis vs. a standard clinical FISH assay described in: Yelensky, R. et al. Analytical validation of solid tumor fusion gene detection in a comprehensive NGS-based clinical cancer genomic test, In: Proceedings of the 105th Annual Meeting of the American Association for Cancer Research; 2014 Apr 5-9; San Diego, CA. Philadelphia (PA): AACR; 2014. Abstract nr 4699

Assay specifications were determined for typical median exon coverage of approximately 500X. For additional information regarding the validation of FoundationOne, please refer to the article, Frampton, GM. et al. Development and validation of a clinical cancer genomic profiling test based on massively parallel DNA sequencing, Nat Biotechnol (2013 Oct. 20).

Microsatellite status (a measure of microsatellite instability, or "MSI") is determined by assessing indel characteristics at 114 homopolymer repeat loci in or near the targeted gene regions of the FoundationOne test. Microsatellite status is assayed for all FoundationOne samples. MSI-High results are reported in all tumor types. In select tumor types, other Microsatellite status results may be reported (MS-Stable, MSI-Ambiguous, MSI-Unknown) when relevant. Microsatellite status result may be reported as "Unknown" if the sample is not of sufficient quality to confidently determine Microsatellite status.

Tumor Mutation Burden (TMB) is determined by measuring the number of somatic mutations occurring in sequenced genes on the

FoundationOne and FoundationOne Heme tests and extrapolating to the genome as a whole. TMB is assayed for all FoundationOne and FoundationOne Heme samples. TMB-High results are reported in all tumor types. In select tumor types, other TMB results may be reported (TMB-Intermediate, TMB-Low, TMB-Unknown) when relevant. TMB results are determined as follows: TMB-High corresponds to greater than or equal to 20 mutations per megabase (Muts/Mb); TMB-Intermediate corresponds to 6-19 Muts/Mb; TMB-Low corresponds to less than or equal to 5 Muts/Mb. Tumor Mutation Burden may be reported as "Unknown" if the sample is not of sufficient quality to confidently determine Tumor Mutation Burden.

<sup>11</sup>Reduced Sensitivity: Although we can definitively confirm the presence of the genomic alterations detailed in this report, the data obtained may have been insufficient for comprehensive detection of genomic alterations. Reduced sensitivity may be due to poor sample quality or, in rare cases, to patient transplant history. Any Tumor Mutation Burden (TMB) value (Muts/Mb) shown on a report with reduced sensitivity reflects an estimate of the lowest possible TMB.

**Genes Assayed in DX1:**

|         |          |          |         |        |
|---------|----------|----------|---------|--------|
| ABL1    | ACVR1B   | AKT1     | AKT2    | AKT3   |
| ALK     | ALOX12B  | APC      | AR      | ARAF   |
| ARFRP1  | ARID1A   | ASXL1    | ATM     | ATR    |
| ATRX    | AURKA    | AURKB    | AXIN1   | AXL    |
| BAP1    | BARD1    | BCL2     | BCL2L1  | BCL2L2 |
| BCL6    | BCOR     | BCORL1   | BCR     | BRAF   |
| BRCA1   | BRCA2    | BRD4     | BRIP1   | BTG1   |
| BTG2    | BTK      | C17orf39 | CALR    | CARD11 |
| CASP8   | CBFB     | CBL      | CCND1   | CCND2  |
| CCND3   | CCNE1    | CD22     | CD274   | CD70   |
| CD74    | CD79A    | CD79B    | CDC73   | CDH1   |
| CDK12   | CDK4     | CDK6     | CDK8    | CDKN1A |
| CDKN1B  | CDKN2A   | CDKN2B   | CDKN2C  | CEBPA  |
| CHEK1   | CHEK2    | CIC      | CREBBP  | CRKL   |
| CSF1R   | CSF3R    | CTCF     | CTNNA1  | CTNNB1 |
| CUL3    | CUL4A    | CXCR4    | CYP17A1 | DAXX   |
| DDR1    | DDR2     | DIS3     | DNMT3A  | DOT1L  |
| EED     | EGFR     | EMSY     | EP300   | EPHA3  |
| EPHB1   | EPHB4    | ERBB2    | ERBB3   | ERBB4  |
| ERCC4   | ERG      | ERRF1    | ESR1    | ETV4   |
| ETV5    | ETV6     | EWSR1    | EZH2    | EZR    |
| FAM123B | FAM46C   | FANCA    | FANCC   | FANCG  |
| FANCL   | FAS      | FBXW7    | FGF10   | FGF12  |
| FGF14   | FGF19    | FGF23    | FGF3    | FGF4   |
| FGF6    | FGFR1    | FGFR2    | FGFR3   | FGFR4  |
| FH      | FLCN     | FLT1     | FLT3    | FOXL2  |
| FUBP1   | GABRA6   | GATA3    | GATA4   | GATA6  |
| GNA11   | GNA13    | GNAQ     | GNAS    | GRM3   |
| GSK3B   | H3F3A    | HDAC1    | HGF     | HNF1A  |
| HRAS    | HSD3B1   | ID3      | IDH1    | IDH2   |
| IGF1R   | IKBKE    | IKZF1    | INPP4B  | IRF2   |
| IRF4    | IRS2     | JAK1     | JAK2    | JAK3   |
| JUN     | KDM5A    | KDM5C    | KDM6A   | KDR    |
| KEAP1   | KEL      | KIT      | KLHL6   | KRAS   |
| LTK     | LYN      | MAF      | MAP2K1  | MAP2K2 |
| MAP2K4  | MAP3K1   | MAP3K13  | MAPK1   | MCL1   |
| MDM2    | MDM4     | MED12    | MEF2B   | MEN1   |
| MERTK   | MET      | MITF     | MKNK1   | MLH1   |
| MLL     | MLL2     | MPL      | MRE11A  | MSH2   |
| MSH3    | MSH6     | MST1R    | MTAP    | MTOR   |
| MUTYH   | MYB      | MYC      | MYCL1   | MYCN   |
| MYD88   | NBN      | NF1      | NF2     | NFE2L2 |
| NFKBIA  | NKX2-1   | NOTCH1   | NOTCH2  | NOTCH3 |
| NPM1    | NRAS     | NT5C2    | NTRK1   | NTRK2  |
| NTRK3   | NUTM1    | P2RY8    | PALB2   | PARK2  |
| PARP1   | PARP2    | PARP3    | PAX5    | PBRM1  |
| PDCD1   | PDCD1LG2 | PDGFRA   | PDGFRB  | PDK1   |
| PIK3C2B | PIK3C2G  | PIK3CA   | PIK3CB  | PIK3R1 |
| PIM1    | PMS2     | POLD1    | POLE    | PPARG  |
| PPP2R1A | PPP2R2A  | PRDM1    | PRKAR1A | PRKCI  |
| PTCH1   | PTEN     | PTPN11   | PTPRO   | QKI    |
| RAC1    | RAD21    | RAD51    | RAD51B  | RAD51C |

---

|         |         |         |         |          |
|---------|---------|---------|---------|----------|
| RAD51D  | RAD52   | RAD54L  | RAF1    | RARA     |
| RB1     | RBM10   | REL     | RET     | RICTOR   |
| RNF43   | ROS1    | RPTOR   | RSPO2   | SDC4     |
| SDHA    | SDHB    | SDHC    | SDHD    | SETD2    |
| SF3B1   | SGK1    | SLC34A2 | SMAD2   | SMAD4    |
| SMARCA4 | SMARCB1 | SMO     | SNCAIP  | SOCS1    |
| SOX2    | SOX9    | SPEN    | SPOP    | SRC      |
| STAG2   | STAT3   | STK11   | SUFU    | SYK      |
| TBX3    | TEK     | TERC    | TERT    | TET2     |
| TGFBR2  | TIPARP  | TMPRSS2 | TNFAIP3 | TNFRSF14 |
| TP53    | TSC1    | TSC2    | TYRO3   | U2AF1    |
| VEGFA   | VHL     | WHSC1   | WHSC1L1 | WT1      |
| XPO1    | XRCC2   | ZNF217  | ZNF703  |          |

---

## Genes Assayed in the Foundation Medicine Assay

The current Foundation Medicine assay is designed to include all genes known to be somatically altered in human solid tumors that are validated targets for therapy, either approved or in clinical trials, and/or that are unambiguous drivers of oncogenesis based on current knowledge. The assay will be updated periodically to reflect new knowledge about cancer biology.
